4331

## Safety and efficacy of sacubitril/valsartan by dose level in patients hospitalized with acute heart failure: Observations from PIONEER-HF

D.A. Morrow<sup>1</sup>, E.J. Velazquez<sup>2</sup>, A.D. Devore<sup>3</sup>, C.I. Duffy<sup>4</sup>, Y. Gurmu<sup>1</sup>, K. McCague<sup>4</sup>, R. Rocha<sup>4</sup>, E. Braunwald<sup>1</sup>

<sup>1</sup>Brigham and Women's Hospital, Cardiovascular Medicine, Boston, United States of America; <sup>2</sup>Yale University, Department of Internal Medicine, New Haven, United States of America; <sup>3</sup>Duke Clinical Research Institute, Durham, United States of America; <sup>4</sup>Novartis Pharmaceuticals, East Hanover, United States of America

**Funding Acknowledgement:** Novartis Pharmaceuticals

**Background:** In hemodynamically stabilized patients with acute decompensated heart failure (ADHF) enrolled in the PIONEER-HF trial, compared with enalapril, sacubitril/valsartan started in-hospital and continued for 8 weeks was well tolerated, achieved a greater reduction in NT-proBNP, and reduced cardiovascular death or rehospitalization for HF. Nearly 1/2 of patients achieved the target dose of blinded study drug. We performed an exploratory analysis of the safety and efficacy of sacubitril/valsartan according to the dose level dispensed at 4 weeks in PIONEER-HF

**Methods:** PIONEER-HF was a randomized, double-blind, active-controlled trial of sacubitril/valsartan vs. enalapril in 881 hospitalized ADHF pts following hemodynamic stabilization. Blinded study medication was administered for 8-weeks, with initial dosing selected based on the systolic blood pressure (SBP) at randomization (starting dose 24/26 or 49/51 mg twice daily vs 2.5 or 5 mg twice daily) and titrated toward a target of sacubitril/valsartan

97 mg/103 mg twice daily, or enalapril 10 mg twice daily with an algorithm using SBP along w/ the investigator's assessment of tolerability.

**Results:** At the week 4 visit, 199 patients (45.2%) in the sacubitril/valsartan group and 210 (47.6%) in the enalapril group were dispensed the target dose. Baseline characteristics were similar in the 2 treatment groups within each dose level. The prespecified adverse events of special interest were similar between sacubitril/valsartan and enalapril irrespective of dose level (Table) with no significant heterogeneity. In addition, there was no heterogeneity across dose levels in the favorable effect of sacubitril/valsartan on the change in NTproBNP by week 8 (Table, p-interaction=0.54) or the serious composite endpoint (p-interaction=0.71).

**Conclusion:** In hemodynamically stabilized patients with ADHF, the safety and efficacy of sacubitril/valsartan appears generally consistent among patients at various dose levels.

| Dose Level at Week 4 Visit  | Dose level 1      |                | Dose Level 2      |                | Dose Level 3      |                |
|-----------------------------|-------------------|----------------|-------------------|----------------|-------------------|----------------|
| Dose Details                |                   |                |                   |                |                   |                |
| Study rx                    | Enalapril         | Sacubitril/Val | Enalapril         | Sacubitril/Val | Enalapril         | Sacubitril/Val |
| Dose (2x/d)                 | 2.5mg             | 24mg/26mg      | 5mg               | 49mg/51mg      | 10mg              | 97mg/103mg     |
| N                           | 66 (15.0)         | 70 (15.9)      | 82 (18.6)         | 93 (21.1)      | 210 (47.6)        | 199 (45.2)     |
| Safety                      |                   |                |                   |                |                   |                |
| Symptomatic Hypotension     | 27.3              | 20.0           | 19.5              | 15.1           | 5.2               | 10.1           |
| HR [95% CI]                 | 0.73 [0.40, 1.35] |                | 0.77 [0.40, 1.48] |                | 1.92 [0.94, 3.90] |                |
| Hyperkalemia                | 13.6              | 18.6           | 12.2              | 16.1           | 7.1               | 6.0            |
| HR [95% CI]                 | 1.36 [0.62, 2.97] |                | 1.32 [0.63, 2.78] |                | 0.84 [0.41, 1.76] |                |
| Worsened renal function     | 33.3              | 24.3           | 22.0              | 14.0           | 11.9              | 12.6           |
| HR [95% CI]                 | 0.73 [0.43, 1.25] |                | 0.64 [0.33, 1.22] |                | 1.06 [0.63, 1.77] |                |
| Efficacy                    |                   |                |                   |                |                   |                |
| NTproBNP ratio 8wk/Baseline | 0.69              | 0.40           | 0.61              | 0.47           | 0.57              | 0.40           |
| Ratio S/V vs E              | 0.58 [0.41, 0.83] |                | 0.77 [0.58, 1.01] |                | 0.70 [0.56, 0.87] |                |
| Serious composite           | 19.8              | 10.0           | 11.0              | 7.5            | 11.0              | 3.5            |
| HR [95% CI]                 | 0.48 [0.19, 1.21] |                | 0.66 [0.25, 1.77] |                | 0.31 [0.13, 0.72] |                |

Event rates are reported as % at 8 wk. Serious Composite = death, HF re-hosp, LVAD, listed for transplant.

Efficacy and Safety by Dose-Tier
